# Supplementary material for: Maximizing Telerehabilitation for Patients With Visual Loss After Stroke: Interview and Focus Group Study With Stroke Survivors, Carers, and Occupational Therapists
Source: PubMed Central journal article supplement (PMC7647809; doi:10.2196/19604), 2020-10-23
Supplement: jmir_v22i10e19604_app5.pdf [file jmir_v22i10e19604_app5.pdf]

|                                                              |         |                                   |        |                                   |         |                                   |        |
|--------------------------------------------------------------|---------|-----------------------------------|--------|-----------------------------------|---------|-----------------------------------|--------|
| <i>Variables</i>                                             |         |                                   |        |                                   |         |                                   |        |
| <i>Age</i>                                                   | -.50*** | <i>Age</i>                        | -.41** | <i>Age</i>                        | -.48*** | <i>Age</i>                        | -.35*  |
| <i>Speech</i>                                                | -.31**  | <i>Concentration</i>              | -.40** | <i>Concentration</i>              | -.30*   | <i>Driving</i>                    | -.40** |
| <i>Driving</i>                                               | -.26    |                                   |        |                                   |         | <i>Tiredness</i>                  | -.37** |
|                                                              |         |                                   |        |                                   |         | <i>Pain</i>                       | -.28*  |
| <i>Note: R<sup>2</sup> = .426</i>                            |         | <i>Note: R<sup>2</sup> = .278</i> |        | <i>Note: R<sup>2</sup> = .281</i> |         | <i>Note: R<sup>2</sup> = .411</i> |        |
| * <i>p</i> < .05<br>** <i>p</i> < .01<br>*** <i>p</i> < .001 |         |                                   |        |                                   |         |                                   |        |

### *Predictors of most useful types of support post-stroke*

Seven stepwise regressions were conducted to investigate predictors of the most useful types of support for tele-rehabilitation post-stroke (see summary in Table 4). Movement Issues, ( $t = 2.867, p = .006$ ) and Speech Issues, ( $t = 2.027, p = .049$ ) significantly predicted perceived helpfulness of Face-to-Face appointments. Both were positively associated with finding face-to-face appointments helpful, such that a person with these impairments would find such appointments more helpful. The final model was significant ( $F_{(2, 42)} = 9.037, p = .001$ ), and explained 30.1% of the variance.

Confidence using the internet, ( $t = 2.85, p = .007$ ) and Movement Issues ( $t = 2.49, p = .017$ ) were significant positive predictors of the perceived helpfulness of phone support.; people who were more confident using the internet and reported mobility issues found one-to-one phone support most helpful. The final model was significant ( $F_{(2, 43)} = 6.22, p = .004$ ), and accounted for 22.4% of the variance.

Whether individuals were afraid of making mistakes on the internet ( $t = -4.22, p < .001$ ) significantly predicted the perceived helpfulness of Audio Guides, with a negative association found; the more a person is afraid of making mistakes the more helpful they find audio guides. The final model was significant ( $F_{(1, 43)} = 17.76, p < .001$ ), and explained 29.2% of the variance.

Issues with Personal Care ( $t = 2.82, p = .007$ ), Issues with Memory ( $t = -2.41, p = .02$ ) and Confidence using the Internet ( $t = 4.002, p < .001$ ) significantly predicted the perceived helpfulness of Online User Guides. Issues with memory were negatively associated, and Issues with personal care and Confidence using the Internet were positively associated, meaning that people who did not have issues with memory but had issues with personal care and felt more confident using the internet found Online User Guides more helpful. The final model was significant ( $F_{(3, 42)} = 11.031, p < .001$ ), and explained 44.1% of the variance.

Issues with balance ( $t = -2.22, p = .032$ ) significantly predicted perceived helpfulness of Paper-Based Guides, and the association was negative; people who did not have issues with balance found paper-based guides more helpful. The final model was significant ( $F_{(1, 42)} = 4.94, p = .032$ ), and explained 10.5% of the variance.

Confidence using the Internet ( $t = 5.51, p < .001$ ) significantly predicted how helpful online forums were perceived in a positive way; the more confident a person is using the internet the more helpful they find online forums. The final model was significant ( $F_{(1, 44)} = 30.33, p < .001$ ), and explained 40.8% of the variance.

*Table 4: Results of regression analyses indicating key predictors most useful type of support post-stroke*

| <i>Face-to-Face</i>                                                                                | <i>B</i> | <i>Phone support</i>              | $\beta$ | <i>Audio Guides</i>               | $\beta$ | <i>Online Guides</i>              | $\beta$ | <i>Paper-based Guides</i>         | $\beta$ | <i>Online forums</i>              | $\beta$ |
|----------------------------------------------------------------------------------------------------|----------|-----------------------------------|---------|-----------------------------------|---------|-----------------------------------|---------|-----------------------------------|---------|-----------------------------------|---------|
| <i>Variables</i>                                                                                   |          |                                   |         |                                   |         |                                   |         |                                   |         |                                   |         |
| <i>Movement</i>                                                                                    | .39**    | <i>Internet Confidence</i>        | .39**   | <i>Making Mistakes</i>            | -.54*** | <i>Personal Care issues</i>       | .33**   | <i>Balance</i>                    | -.33*   | <i>Internet Confidence</i>        | .639*** |
| <i>Speech</i>                                                                                      | .28*     | <i>Movement Issues</i>            | .34*    |                                   |         | <i>Memory Issues</i>              | -.28*   |                                   |         |                                   |         |
|                                                                                                    |          |                                   |         |                                   |         | <i>Internet confidence</i>        | .47***  |                                   |         |                                   |         |
| <i>Note: R<sup>2</sup> = .301</i>                                                                  |          | <i>Note: R<sup>2</sup> = .224</i> |         | <i>Note: R<sup>2</sup> = .292</i> |         | <i>Note: R<sup>2</sup> = .441</i> |         | <i>Note: R<sup>2</sup> = .105</i> |         | <i>Note: R<sup>2</sup> = .408</i> |         |
| <p>* <math>p &lt; .05</math><br/> ** <math>p &lt; .01</math><br/> *** <math>p &lt; .001</math></p> |          |                                   |         |                                   |         |                                   |         |                                   |         |                                   |         |

*Predictors of most supportive partnership pivots post-stroke*

No significant predictors were found.
